# Supplementary material for: Extended Fe4 butterfly complexes: theoretical analysis of magnetic properties and magnetostructural maps
Source: Royal Society of Chemistry journal article supplement (doi:10.1039/b925699g), 2010-01-01

## Electronic Supplementary Information

**Table S1.** Spin population obtained using a Mulliken approach for the iron and oxygen bridging atoms in the highest (HS) and lowest spin (LS) configuration.

|                        | HS     | LS      |
|------------------------|--------|---------|
| Fe1                    | 4.3129 | 4.3035  |
| Fe2                    | 4.3129 | 4.3035  |
| Fe3                    | 4.1933 | -4.1848 |
| Fe4                    | 4.1933 | -4.1848 |
| O1 [Fe1, Fe2, Fe4, Y6] | 0.3989 | 0.1720  |
| O2 [Fe1, Fe2, Fe3, Y5] | 0.3989 | 0.1720  |
| O3 [Fe3, Y5]           | 0.1847 | -0.1816 |
| O4 [Fe4, Y6]           | 0.1847 | -0.1816 |
| O5 [Fe1, Fe3]          | 0.2420 | -0.0594 |
| O6 [Fe2, Fe4]          | 0.2420 | -0.0594 |
| O7 [Fe2, Fe3]          | 0.2267 | -0.0196 |
| O8 [Fe1, Fe4]          | 0.2267 | -0.0196 |

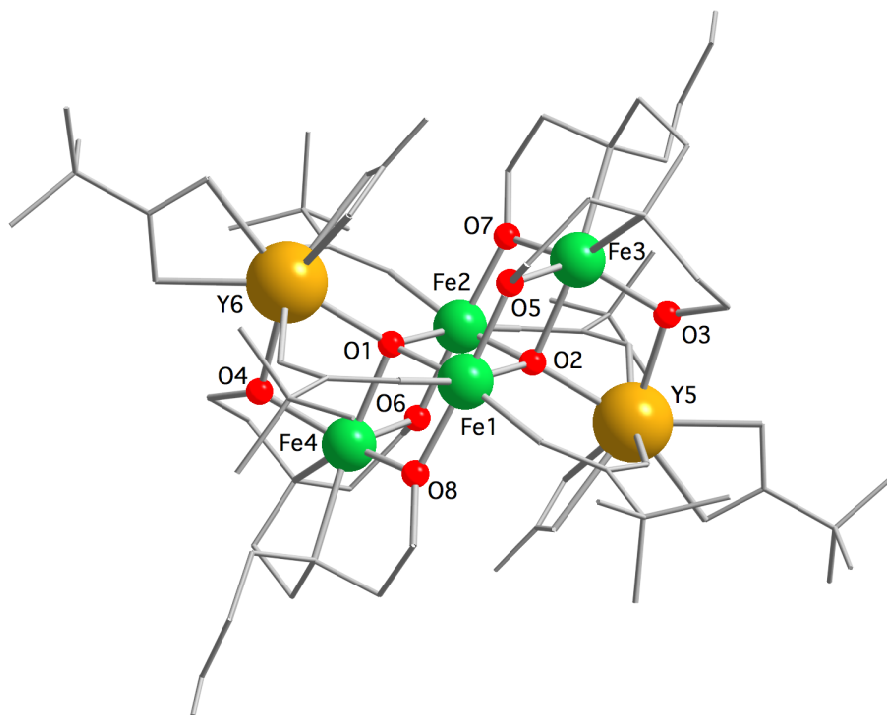

Supplement: b925699g.pdf [file b925699g.pdf]
